# Supplementary material
Source: publisher figshare collection journal article supplement (https://acs.figshare.com/ndownloader/files/3721249)
Supplement: Supplementary file 1 [file 3721249]

Compound_ID,SMILES,Physical state ,Melting Point,MIC,MIC,MIC,MIC,HC50,
,,,Degree celcious,"S. aureus  
DM4001R ","MRSA 
DM9808R
","MRSA 
DM21455
","B. cereus 
ATCC11778
",microgram per mL,
,,,,,,,,,
1a,O=C1C2=C(C=C(OCCBr)C(C/C=C(C)/C)=C2O)OC3=CC(OCCBr)=C(OC)C(C/C=C(C)/C)=C31,light yellow solid,148-150,ND,ND,ND,ND,ND,
1f,O=C1C2=C(C=C(OCCCCCCCCBr)C(C/C=C(C)/C)=C2O)OC3=CC(OCCCCCCCCBr)=C(OC)C(C/C=C(C)/C)=C31,light yellow solid,73-75,ND,ND,ND,ND,ND,
1g,O=C1C2=C(C=C(OCCCCCCCCCCBr)C(C/C=C(C)/C)=C2O)OC3=CC(OCCCCCCCCCCBr)=C(OC)C(C/C=C(C)/C)=C31,light yellow oil ,NA,ND,ND,ND,ND,ND,
1h,O=C1C2=C(C=C(OCCCCCCCCCCCCBr)C(C/C=C(C)\C)=C2O)OC3=CC(OCCCCCCCCCCCCBr)=C(OC)C(C/C=C(C)/C)=C31,light yellow oil ,NA,ND,ND,ND,ND,ND,
2a,O=C1C2=C(C=C(OCCN(CC)CC)C(C/C=C(C)/C)=C2O)OC3=CC(OCCN(CC)CC)=C(OC)C(C/C=C(C)/C)=C31,light yellow oil ,NA,>50,>50,>50,>50,> 200,
2b,O=C1C2=C(C=C(OCCCN(CC)CC)C(C/C=C(C)/C)=C2O)OC3=CC(OCCCN(CC)CC)=C(OC)C(C/C=C(C)/C)=C31,light yellow oil ,NA,0.78,0.78,0.39,6.25,16.3,
2c,O=C1C2=C(C=C(OCCCCN(CC)CC)C(C/C=C(C)/C)=C2O)OC3=CC(OCCCCN(CC)CC)=C(OC)C(C/C=C(C)/C)=C31,light yellow oil ,NA,0.39,0.78,0.39,3.125,19.6,
2d,O=C1C2=C(C=C(OCCCCCN(CC)CC)C(C/C=C(C)/C)=C2O)OC3=CC(OCCCCCN(CC)CC)=C(OC)C(C/C=C(C)/C)=C31,light yellow oil ,NA,1.56,1.56,0.78,6.25,14,
2e,O=C1C2=C(C=C(OCCCCCCN(CC)CC)C(C/C=C(C)/C)=C2O)OC3=CC(OCCCCCCN(CC)CC)=C(OC)C(C/C=C(C)/C)=C31,light yellow oil ,NA,1.56,3.125,1.56,3.125,26.5,
2f,O=C1C2=C(C=C(OCCCCCCCCN(CC)CC)C(C/C=C(C)/C)=C2O)OC3=CC(OCCCCCCCCN(CC)CC)=C(OC)C(C/C=C(C)/C)=C31,light yellow oil ,NA,> 50,> 50,> 50,> 50,53.1,
2g,O=C1C2=C(C=C(OCCCCCCCCCCN(CC)CC)C(C/C=C(C)/C)=C2O)OC3=CC(OCCCCCCCCCCN(CC)CC)=C(OC)C(C/C=C(C)/C)=C31,light yellow oil ,NA,> 50,> 50,> 50,> 50,200,
2h,O=C1C2=C(C=C(OCCCCCCCCCCCCN(CC)CC)C(C/C=C(C)/C)=C2O)OC3=CC(OCCCCCCCCCCCCN(CC)CC)=C(OC)C(C/C=C(C)/C)=C31,light yellow oil ,NA,> 50,> 50,> 50,> 50,> 200,
3,O=C1C2=C(C=C(OCCCCN3C(C(C=CC=C4)=C4C3=O)=O)C(C/C=C(C)/C)=C2O)OC5=CC(OCCCCN6C(C(C=CC=C7)=C7C6=O)=O)=C(OC)C(C/C=C(C)/C)=C51,light yellow solid ,107-109 ,> 50,> 50,> 50,> 50,>200,
3a,O=C1C2=C(C=C(OCCCCN)C(C/C=C(C)\C)=C2O)OC3=CC(OCCCCN)=C(OC)C(C/C=C(C)/C)=C31,light yellow solid ,136-138,1.56,3.125,1.56,3.125,80.2,
3b,O=C1C2=C(C=C(OCCCCNC(N)=N)C(C/C=C(C)\C)=C2O)OC3=CC(OCCCCNC(N)=N)=C(OC)C(C/C=C(C)/C)=C31,light yellow oil ,NA,3.125,6.25,6.25,6.25,64.1,
4a,O=C1C2=C(C=C(OCCCCN(C)C)C(C/C=C(C)\C)=C2O)OC3=CC(OCCCCN(C)C)=C(OC)C(C/C=C(C)/C)=C31,light yellow oil ,NA,3.125,3.125,3.125,6.25,32.1,
4b,O=C1C2=C(C=C(OCCCCN(CCO)CCO)C(C/C=C(C)\C)=C2O)OC3=CC(OCCCCN(CCO)CCO)=C(OC)C(C/C=C(C)/C)=C31,light yellow oil ,NA,3.125,1.56,0.78,3.125,60.6,
4c,O=C1C2=C(C=C(OCCCCN(CC)C)C(C/C=C(C)\C)=C2O)OC3=CC(OCCCCN(CC)C)=C(OC)C(C/C=C(C)/C)=C31,light yellow oil ,NA,1.56,6.25,1.56,6.25,25.1,
4d,O=C1C2=C(C=C(OCCCCN(CCC)C)C(C/C=C(C)\C)=C2O)OC3=CC(OCCCCN(CCC)C)=C(OC)C(C/C=C(C)/C)=C31,light yellow oil ,NA,25,25,12.5,12.5,32.6,
4e,O=C1C2=C(C=C(OCCCCN(CCO)CC)C(C/C=C(C)\C)=C2O)OC3=CC(OCCCCN(CCO)CC)=C(OC)C(C/C=C(C)/C)=C31,light yellow oil ,NA,6.25,3.125,6.25,3.125,31.8,
4f,O=C1C2=C(C=C(OCCCCN(CCCC)C)C(C/C=C(C)\C)=C2O)OC3=CC(OCCCCN(CCCC)C)=C(OC)C(C/C=C(C)/C)=C31,light yellow oil ,NA,50,50,25,25,60.5,
4g,O=C1C2=C(C=C(OCCCCN(CCC)CC)C(C/C=C(C)\C)=C2O)OC3=CC(OCCCCN(CCC)CC)=C(OC)C(C/C=C(C)/C)=C31,light yellow oil ,NA,6.25,6.25,12.5,25,63.3,
4h,O=C1C2=C(C=C(OCCCCN(C(C)C)CC)C(C/C=C(C)\C)=C2O)OC3=CC(OCCCCN(C(C)C)CC)=C(OC)C(C/C=C(C)/C)=C31,light yellow oil ,NA,25,12.5,25,12.5,54.6,
4i,O=C1C2=C(C=C(OCCCCN(CCCCC)C)C(C/C=C(C)\C)=C2O)OC3=CC(OCCCCN(CCCCC)C)=C(OC)C(C/C=C(C)/C)=C31,light yellow oil ,NA,25,25,25,12.5,> 200,
4j,O=C1C2=C(C=C(OCCCCN(CCCC)CC)C(C/C=C(C)\C)=C2O)OC3=CC(OCCCCN(CCCC)CC)=C(OC)C(C/C=C(C)/C)=C31,light yellow oil ,NA,12.5,6.25,25,25,> 200,
4k,O=C1C2=C(C=C(OCCCCN(CCC)CCC)C(C/C=C(C)\C)=C2O)OC3=CC(OCCCCN(CCC)CCC)=C(OC)C(C/C=C(C)/C)=C31,light yellow oil ,NA,25,50,25,50,> 200,
4l,O=C1C2=C(C=C(OCCCCN(CCCCCC)C)C(C/C=C(C)\C)=C2O)OC3=CC(OCCCCN(CCCCCC)C)=C(OC)C(C/C=C(C)/C)=C31,light yellow oil ,NA,50,50,50,50,> 200,
4m,O=C1C2=C(C=C(OCCCCN(CCCC)CCCC)C(C/C=C(C)\C)=C2O)OC3=CC(OCCCCN(CCCC)CCCC)=C(OC)C(C/C=C(C)/C)=C31,light yellow oil ,NA,> 50,50,> 50,50,> 200,
4n,O=C1C2=C(C=C(OCCCCN(CC3=CC=CC=C3)C)C(C/C=C(C)\C)=C2O)OC4=CC(OCCCCN(CC5=CC=CC=C5)C)=C(OC)C(C/C=C(C)/C)=C41,light yellow oil ,NA,> 50,50,> 50,50,> 200,
5a,O=C1C2=C(C=C(OCCCCN3CCCC3)C(C/C=C(C)/C)=C2O)OC4=CC(OCCCCN5CCCC5)=C(OC)C(C/C=C(C)/C)=C41,light yellow oil ,NA,1.56,1.56,1.56,6.25,25,
5b,O=C1C2=C(C=C(OCCCCN3CC[C@@H](N(C)C)C3)C(C/C=C(C)\C)=C2O)OC4=CC(OCCCCN5C[C@H](N(C)C)CC5)=C(OC)C(C/C=C(C)/C)=C41,brown oil ,NA,12.5,6.25,6.25,6.25,28.9,
5c,O=C1C2=C(C=C(OCCCCN3CCCCC3)C(C/C=C(C)\C)=C2O)OC4=CC(OCCCCN5CCCCC5)=C(OC)C(C/C=C(C)/C)=C41,light yellow oil ,NA,0.78,1.56,1.56,6.25,19.3,
5d,O=C1C2=C(C=C(OCCCCN3CCC(O)CC3)C(C/C=C(C)/C)=C2O)OC4=CC(OCCCCN5CCC(O)CC5)=C(OC)C(C/C=C(C)/C)=C41,brown oil ,NA,6.25,3.125,12.5,6.25,36,
5e,O=C1C2=C(C=C(OCCCCN3CCOCC3)C(C/C=C(C)/C)=C2O)OC4=CC(OCCCCN5CCOCC5)=C(OC)C(C/C=C(C)/C)=C41,light yellow oil ,NA,> 50,> 50,> 50,> 50,> 200,
5f,O=C1C2=C(C=C(OCCCCN3CCSCC3)C(C/C=C(C)/C)=C2O)OC4=CC(OCCCCN5CCSCC5)=C(OC)C(C/C=C(C)/C)=C41,brown oil ,NA,> 50,> 50,> 50,> 50,> 200,
5g,O=C1C2=C(C=C(OCCCCN3CCNCC3)C(C/C=C(C)\C)=C2O)OC4=CC(OCCCCN5CCNCC5)=C(OC)C(C/C=C(C)/C)=C41,light yellow oil ,NA,6.25,6.25,12.5,12.5,72.1,
5h,O=C1C2=C(C=C(OCCCCN3CCN(C)CC3)C(C/C=C(C)\C)=C2O)OC4=CC(OCCCCN5CCN(C)CC5)=C(OC)C(C/C=C(C)/C)=C41,light yellow oil ,NA,6.25,12.5,12.5,12.5,32.3,
5i,O=C1C2=C(C=C(OCCCCN3CCN(CC)CC3)C(C/C=C(C)/C)=C2O)OC4=CC(OCCCCN5CCN(CC)CC5)=C(OC)C(C/C=C(C)/C)=C41,light yellow oil ,NA,6.25,12.5,6.25,25,138.5,
5j,O=C1C2=C(C=C(OCCCCN3CCN(CCN(C)C)CC3)C(C/C=C(C)\C)=C2O)OC4=CC(OCCCCN5CCN(CCN(C)C)CC5)=C(OC)C(C/C=C(C)/C)=C41,light yellow oil ,NA,6.25,3.125,3.125,6.25,35.9,
5k,O=C1C2=C(C=C(OCCCCN3CCN(C(OC(C)(C)C)=O)CC3)C(C/C=C(C)\C)=C2O)OC4=CC(OCCCCN5CCN(C(OC(C)(C)C)=O)CC5)=C(OC)C(C/C=C(C)/C)=C41,light yellow oil ,NA,> 50,> 50,> 50,> 50,> 200,
6a,O=C1C2=C(C=C(OCCCCN3C=CN=C3)C(C/C=C(C)\C)=C2O)OC4=CC(OCCCCN5C=NC=C5)=C(OC)C(C/C=C(C)/C)=C41,light yellow solid,74-76,> 50,> 50,> 50,> 50,> 200,
6b,O=C1C2=C(C=C(OCCCCN3N=CN=C3)C(C/C=C(C)/C)=C2O)OC4=CC(OCCCCN5C=NC=N5)=C(OC)C(C/C=C(C)/C)=C41,light yellow oil ,NA,> 50,> 50,> 50,> 50,> 200,
6c,O=C1C2=C(C=C(OCCCCN3N=CC=C3)C(C/C=C(C)/C)=C2O)OC4=CC(OCCCCN5C=CC=N5)=C(OC)C(C/C=C(C)/C)=C41,light yellow oil ,NA,> 50,> 50,> 50,> 50,> 200,
7,O=C1C2=C(C=C(O)C=C2O)OC3=CC(O)=CC=C31,light yellow oil ,NA,> 50,> 50,> 50,50,> 200,
8a,O=C1C2=C(C=C(OCCCCN(CC)CC)C=C2O)OC3=CC(OCCCCN(CC)CC)=CC=C31,light yellow oil ,NA,> 50,> 50,> 50,50,> 200,
8b,O=C1C2=C(C=C(OCCCCN3CCCC3)C=C2O)OC4=CC(OCCCCN5CCCC5)=CC=C41,light yellow oil ,NA,> 50,> 50,> 50,50,> 200,
9,O=C1C2=C(C=C(O)C(CCC(C)C)=C2O)OC3=CC(O)=C(OC)C(CCC(C)C)=C31,light yellow oil ,NA,> 50,> 50,> 50,50,38,
10a,O=C1C2=C(C=C(OCCCCN(CC)CC)C(CCC(C)C)=C2O)OC3=CC(OCCCCN(CC)CC)=C(OC)C(CCC(C)C)=C31,light yellow oil ,NA,3.125,12.5,25,25,48.6,
10b,O=C1C2=C(C=C(OCCCCN(C)C)C(CCC(C)C)=C2O)OC3=CC(OCCCCN(C)C)=C(OC)C(CCC(C)C)=C31,light yellow oil ,NA,25,25,12.5,12.5,60.7,
10c,O=C1C2=C(C=C(OCCCCN3CCCC3)C(CCC(C)C)=C2O)OC4=CC(OCCCCN5CCCC5)=C(OC)C(CCC(C)C)=C41,light yellow oil ,NA,12.5,6.25,6.25,6.25,34.8,
11,O=C1C2=C(C=C(OCCCCI)C(C/C=C(C)/C)=C2OCCCCI)OC3=CC(OCCCCI)=C(OC)C(C/C=C(C)/C)=C31,light yellow solid ,100-102,> 50,> 50,> 50,> 50,> 200,
12,O=C1C2=C(C=C(OCCCCN(CC)CC)C(C/C=C(C)/C)=C2OCCCCN(CC)CC)OC3=CC(OCCCCN(CC)CC)=C(OC)C(C/C=C(C)/C)=C31,light yellow oil ,NA,12.5,50,25,50,> 200,
,NA = Not Applicable,,,,,,,,
,ND = Not Dertermined,,,,,,,,
